# Supplementary material for: Genome-wide analysis of human HSF1 signaling reveals a transcriptional program linked to cellular adaptation and survival
Source: Royal Society of Chemistry journal article supplement (doi:10.1039/b606129j), 2006-06-23
Supplement: b606129j-2.pdf [file b606129j-2.pdf]

Supp. Fig. 1

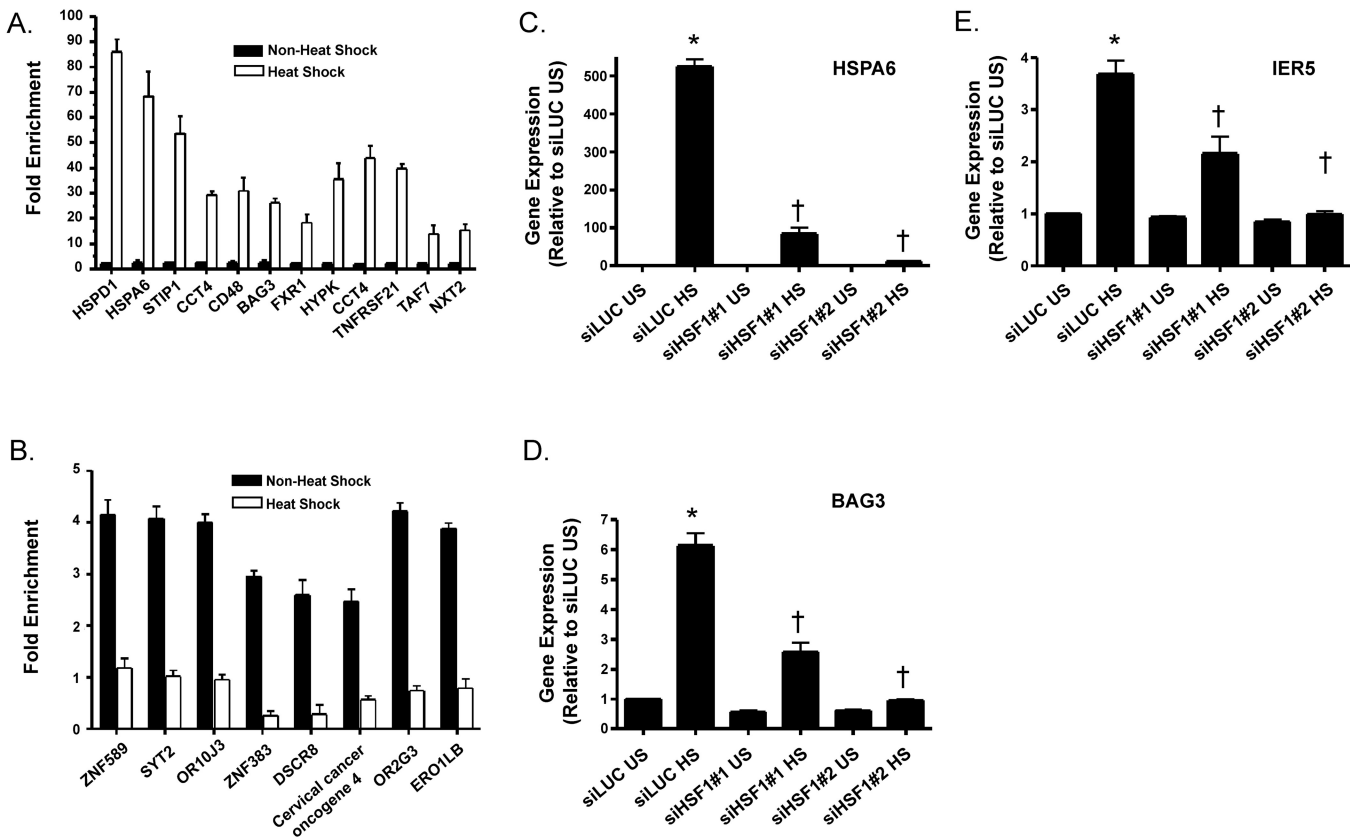

Time course changes in expression for groups of genes in the (A) unfolded protein response, (B) anti-apoptosis, (C) DNA repair, and (D) nuclear mRNA splicing GO categories. Genes contained within each category were significantly altered following heat shock and regulated by HSF1. Filled squares represent probe sets determined to be positively regulated by HSF1 based on siRNA knockdown while filled circles represent probe sets determined to be negatively regulated. The solid line is the median  $\log_2$  gene expression ratio among the probe sets in the GO category and represents the general trend in expression for HSF1-regulated genes with that biological function.
